1 **Title**

2 fMRI Correlates of Reaction Time Prolongation during intentional False  
3 Responding; an inter-individual difference study

4 **Short title (Running Head)**

5 Longer reaction times during lying

6 **Authors**

7 Morteza **Pishnamazi**<sup>a</sup>, Maral **Yeganeh Doost**<sup>a,b</sup>, Habib **Ganjgahi**<sup>a,c</sup>, Hamed **Ekhtiari**<sup>a</sup>,  
8 Mohammad Ali **Oghabian**<sup>a\*</sup>

9 <sup>a</sup> Neuroimaging and Analysis Group (NIAG), Research Center for Molecular and Cellular imaging  
10 (RCMCI), Tehran University of Medical Sciences, Tehran, Iran

11 <sup>b</sup> Université catholique de Louvain (UCL), CHU UCL Namur, Neurology department; UCL, Institute of  
12 Neuroscience (IoNS), Brussels, Belgium.

13 <sup>c</sup> Department of Statistics, University of Warwick Coventry, Warwick, UK

14

15 **Correspondence to**

16 Mohammad Ali Oghabian, PhD

17 Director of Neuroimaging and Analysis Group, Research Center for Molecular and Cellular  
18 Imaging (RCMCI), Tehran University of Medical Sciences

19 Contact info:

20 Imam Khomeini Hospital Complex, Keshavarz Blvd, Tehran, Iran. Postal Code: 1419733141

21 Tel: +98 21 66907518; E-mail: [oghabian@sina.tums.ac.ir](mailto:oghabian@sina.tums.ac.ir)

## 22 ABSTRACT

23 Reaction time (RT) is chiefly longer when people lie. However, the baseline speed in answering  
24 questions and the amount of RT prolongation during lying show considerable amount of inter-individual  
25 variability. In the current study, we exploited this fact to glean insights on the contribution of each lie-  
26 related brain region to hampering of response speeds when people try to be deceitful. In an event-related  
27 fMRI session, participants were interrogated by yes-no autobiographical questions and were instructed to  
28 intentionally provide false responses to a pre-selected subset of questions. Data from twenty healthy  
29 volunteers were analyzed. *Baseline speed* [ $RT_{\text{truth}}$ ] and *relative appended lie RT* [ $(RT_{\text{lie}} - RT_{\text{truth}}) / RT_{\text{truth}}$ ]  
30 measures were calculated for each participant and were included in the group level analysis of [lie > truth]  
31 BOLD contrasts. Lying RTs were significantly longer than truth telling RTs. Lie-related increase in  
32 activity of right ventrolateral prefrontal cortex (VLPFC) and bilateral paracingulate cortex correlated with  
33 the baseline speed of participants, while the increase in activity of Left VLPFC, left lateral occipital  
34 cortex and bilateral anterior cingulate areas directly correlated with the amount of lying reaction time  
35 cost. Activity within bilateral posterior cingulate cortex and right insular cortex inversely correlated with  
36 lying RT-cost. Bilateral supplementary motor areas, internal capsule white matter and left angular gyrus  
37 showed lie-related increase in activity but did not correlate with either of behavioral measures.  
38 Provisional implications regarding the contribution of these regions to RT prolongation and their  
39 cognitive role in deceitful behavior are discussed.

40 **Keywords:** Reaction time, lying, deception, fMRI, prefrontal cortex, VLPFC

## 41 1. INTRODUCTION

42 With the advent of functional magnetic resonance imaging (fMRI), there has been a fast growth in the  
43 neuroimaging literature of deception. Studies commonly aimed to reveal the neural correlates of  
44 deception by contrasting brain activities recorded under conditions of instructed lying versus conditions  
45 of truth telling (Ganis, Kosslyn, Stose, Thompson, & Yurgelun-Todd, 2003; Langleben et al., 2002; T. M.  
46 C. Lee et al., 2002; Spence et al., 2001). Early experiments were followed by series of studies that tried to  
47 reinforce previous findings by using life-like task designs, such as mock crime scenarios (Kozel et al.,  
48 2005, 2009) and deceptive games (Sip et al., 2010, 2012). Results have been comparatively consistent,  
49 showing that areas in ventrolateral prefrontal cortex (VLPFC), dorsolateral prefrontal cortex (DLPFC),  
50 insular cortex, inferior parietal lobule (IPL) and anterior cingulate cortex (ACC) are more active during  
51 lying and deception (Abe, 2011; Christ, Van Essen, Watson, Brubaker, & McDermott, 2009; Farah,  
52 Hutchinson, Phelps, & Wagner, 2014). However, not enough care has been put into interpreting the  
53 specific function of each region; nor has been there enough consideration of the nuisance variables that  
54 could confound the fMRI comparisons between lie and truth conditions (Sip, Roepstorff, McGregor, &  
55 Frith, 2008).

56 Providing false responses is a complex cognitive task that involves processes additional to those used  
57 when telling the truth (Williams, Bott, Patrick, & Lewis, 2013) and demands higher mental effort (Caso,  
58 Gnisci, Vrij, & Mann, 2005; Vrij, Granhag, Mann, & Leal, 2011). To formulate a false response, one  
59 requires to first activate the truth and then modify it (Debey, De Houwer, & Verschuere, 2014). This adds  
60 the steps of response inhibition, task switching and response planning (Debey, Liefoghe, De Houwer, &  
61 Verschuere, 2014; Gombos, 2006; Walczyk, Roper, Seemann, & Humphrey, 2003). Besides, in  
62 comparison with truth telling, lying depends more heavily on working memory and maintained attention  
63 (Gombos, 2006; Vendemia, Buzan, & Simon-Dack, 2005). These higher cognitive demands is reflected in  
64 the longer reaction times (RTs) associated with deceptive responses (Verschuere, Suchotzki, & Debey,  
65 2015). Repeated studies show that RT is chiefly longer when people lie (Marston, 1920; Sheridan &

66 Flowers, 2010; Vendemia et al., 2005; Walczyk et al., 2003). However, the baseline speed in answering  
67 questions and the amount of RT increment imposed by the act of lying (*'RT-cost'*) differ from one  
68 individual to another. In the study by Farrow and colleagues (Farrow, Hopwood, Parks, Hunter, &  
69 Spence, 2011) subjects with higher memory ability had lower absolute truth RTs but the RT difference  
70 scores (lie RT minus truth RT) were adversely affected, showing a positive correlation between memory  
71 ability and the RT-cost of lying. Visu-Petra and colleagues (Visu-Petra, Miclea, Buş, & Visu-Petra, 2014;  
72 Visu-Petra, Miclea, & Visu-Petra, 2012) studied the relation between inter-individual differences in  
73 executive functions (inhibition, shifting, working memory) and the latency of deceptive responses.  
74 Subjects with better inhibitory skills had faster absolute lie RTs but RT difference scores showed no  
75 correlation with any executive function measure. Despite the intuitive involvement of arousal and  
76 emotion mechanism in deception, behavioral experiments report mixed results about the association  
77 between deceptive RTs and measures of anxiety (Visu-Petra et al., 2012), personality (Verschuere & in 't  
78 Hout, 2016; Visu-Petra et al., 2014) or motivation (Kleinberg & Verschuere, 2016; Varga, Visu-Petra,  
79 Miclea, & Visu-Petra, 2015).

80 Superior executive skills seem to be linked with faster baseline speed in answering questions and  
81 lower RT-cost of lying. This association is supported by neuroimaging findings of higher activity within  
82 multiple executive function-related regions in frontal cortex during lying (Christ et al., 2009). However,  
83 the exact relationship between activity within each area and reaction times is not clear. In the current  
84 study we aspire to exploit the inter-individual variance in reaction times to glean insight on the neural  
85 mechanisms underlying prolongation of reaction times when people lie. To that end, we enrolled 25  
86 healthy volunteers in an fMRI experiment. We recorded reaction times and blood oxygenation level  
87 dependent (BOLD) brain activations while subjects were interrogated by a set of yes-no questions and  
88 intentionally provided false responses to a preselected subset of them. Based on reaction time recordings  
89 we calculated measures representing each subjects' baseline speed and RT-cost of lying. We investigated  
90 the correlation of RT-measures with the amount of BOLD activation difference between lying and

91 truthful responding conditions across subjects. The critical question of interest is to specify which brain  
92 regions undertake cognitive processes exclusive to lying (e.g. response inhibition, task switching).  
93 Activity of such a region is expected to only correlate with lie RTs. On the other hand, activity in regions  
94 commonly employed by both truthful and false responding (e.g. attention, working memory) is expected  
95 to correlate with truth RTs and lie RTs similarly.

## 96 **2. MATERIALS AND METHODS**

### 97 **2.1. Participants**

98 Twenty-five healthy, right-handed male volunteers (age 21-30) were recruited and provided informed  
99 consent. All participants went through a standardized medical interview. Exclusion criteria were any  
100 history of psychiatric or neurological disorder, use of any medications during last week, and general MR  
101 safety contraindications. Five participants were excluded from data analyses (three failed to perform  
102 experimental procedures adequately; two because of technical problems in data gathering). The ethical  
103 committee of Tehran University of Medical Sciences approved all procedures.

### 104 **2.2. Procedure**

105 In resemblance to the lying paradigm used in the study by Nuñez and colleagues (Nuñez, Casey,  
106 Egner, Hare, & Hirsch, 2005), our task consisted of yes-no autobiographical questions (e.g. “Do you own  
107 a car?”) and required intentional false responding. First, participants provided truthful yes-no answers to  
108 20 autobiographical questions. We asked subjects to freely choose half of questions. Next, we instructed  
109 them to lie about these pre-selected questions for the rest of the experiment. Prior to main fMRI session, a  
110 5-minute training was run outside the scanner to ensure participants’ familiarity with task procedure.  
111 Total duration of main fMRI session was 16 minutes. We employed event-related task design. Each of 20  
112 questions was presented 5 times in counterbalanced random order. Each question was presented for 2  
113 seconds, followed by a jittered inter-stimulus interval ranging from 3.5 to 11.5 seconds during which a  
114 central fixation sign was displayed. Participants’ responses and reaction times were recorded. Three types  
115 of event could happen: ‘truthful’ answer to questions, intentional ‘false’ answers, and ‘mistakes’ where  
116 subjects failed to provide appropriate response based on their template. Event types were determined  
117 post-hoc based on each subjects’ original responses to questions and their pre-selected lying subset.

### 118 **2.3. fMRI Data Acquisition**

119 Images were acquired using 3.0 T Siemens Magnetom Tim Trio full-body scanner with 12-channel  
120 head coil. Functional T2\*-weighted images were collected using gradient echo-planar imaging (TR =  
121 3000ms, TE = 30ms, flip angle = 90°, FOV = 192 mm, matrix = 64 × 64, voxel size = 3 × 3 × 3 mm). 40  
122 contiguous axial slices provided whole-brain coverage. Three additional images were included at the start  
123 of each run to allow signal stabilization and were excluded from analysis. Prior to the functional scan, T1-  
124 Weighted high-resolution structural image was acquired (TR = 1800ms, TE = 3.44ms, flip angle = 7°,  
125 FOV = 256 mm, matrix = 256 × 256, voxel size = 1 × 1 × 1 mm). This image was used for anatomical  
126 coregistration and normalization.

### 127 **2.4. Reaction Time Analysis**

128 Reaction times of each subject were averaged over truthful events ( $RT_{\text{truth}}$ ) and false responding events  
129 ( $RT_{\text{lie}}$ ). Mistake events and outlier RTs (values that deviated more than 1.5 inter-quartile ranges from the  
130 upper and lower quartiles of each subject) were excluded from these calculations. We aimed to investigate  
131 the relationship between the amount of RT prolongation during lying and the amount of activity in lie-  
132 related brain regions. We employed average  $RT_{\text{truth}}$  of each subject as the measure of baseline speed.  
133 Inter-individual variance in  $RT_{\text{truth}}$  values reflects differences in general dexterity of subjects in  
134 performing task requirements. Competence at cognitive skills specific to the act of deception is not  
135 expected to affect the baseline speed in answering questions. As the measure of RT-cost of lying we  
136 calculated each subjects' '*relative appended lie reaction time*' [ $(RT_{\text{lie}} - RT_{\text{truth}})/RT_{\text{truth}}$ ]. Expressing lying  
137 RT-cost as a fraction of baseline speed nulls the effect of dexterity and accentuates the influence of  
138 deception-specific cognitive processes in determining  $RT_{\text{lie}}$  of an individual.

### 139 **2.5. fMRI Data Analysis**

140 FMRI data processing was carried out using FEAT Version 5.98, part of FSL (FMRIB's Software  
141 Library, [www.fmrib.ox.ac.uk/fsl](http://www.fmrib.ox.ac.uk/fsl)) (Jenkinson, Bannister, Brady, & Smith, 2002). Preprocessing steps  
142 consisted of: brain extraction (Smith, 2002), motion correction (Jenkinson et al., 2002), slice-time

143 correction, Gaussian spatial smoothing (FWHM= 5 mm), and high-pass temporal filtering of the time  
144 series. Voxel time series were modeled by general linear model. Regressors for each event type  
145 ('truthful', 'false', 'mistake') were convolved with canonical hemodynamic response function. BOLD  
146 contrast of [lie > truth] was calculated for each subject. Parameter estimates from single subjects were  
147 entered in random-effect group analysis (Woolrich, Behrens, Beckmann, Jenkinson, & Smith, 2004).  
148 *Baseline speed* measures [ $RT_{\text{truth}}$ ] and *lying RT-cost* measures [ $(RT_{\text{lie}} - RT_{\text{truth}})/RT_{\text{truth}}$ ] were included in  
149 the group-level analysis as between-subject regressors. This allowed us to perform voxel-wise whole-  
150 brain search for voxels where the BOLD activity difference between lie and truth events correlated with  
151 the inter-individual variability in baseline speed and RT-cost. For statistical inference, Z statistic images  
152 were thresholded at  $Z > 2.3$ ; corrected cluster-significances of  $p < 0.05$  were deemed meaningful.



## 153 3. RESULTS

### 154 3.1. Behavioral results

155 Frequency of mistakes was 10.2% on average ( $SD = 9.03$ ), indicating that participants adequately  
156 adhered to their template and task instructions.  $RT_{\text{truth}}$  was 1.81 seconds on average ( $SD = 0.52$ ) while  
157 mean  $RT_{\text{lie}}$  was 1.94 seconds ( $SD = 0.61$ ). This difference was statistically significant based on paired-  
158 samples t-test [ $t(19) = 2.75$ ,  $p = 0.013$ , effect size = 0.6 cohen's  $d$ ]. As expected, there was considerable  
159 amount of inter-individual variability among participants both in the baseline speed of answering  
160 truthfully (range: 1.12 – 3.18 seconds; Figure 1.a) and the difference between  $RT_{\text{lie}}$  and  $RT_{\text{truth}}$   
161 (range: -0.24 – 0.63 seconds; Figure 1.b). *Relative appended lie RT* [ $(RT_{\text{lie}} - RT_{\text{truth}}) / RT_{\text{truth}}$ ] ranged  
162 from -0.11 to 0.31.

163 Correlation between  $RT_{\text{lie}}$  and  $RT_{\text{truth}}$  of participants was highly significant [ $r = 0.941$ ,  $p < 0.001$ ]. On  
164 the other hand, the *relative appended lie RT* and  $RT_{\text{truth}}$  values were not correlated [ $r = 0.005$ ,  $p = 0.984$ ];  
165 this allowed us to independently estimate their correlation with lie-related brain activations (Mumford,  
166 Poline, & Poldrack, 2015).

### 167 3.2. Functional imaging results

168 Table 1 presents the results of group-level contrast of [lie > truth] BOLD parameter estimates. We  
169 classified this set of anatomical areas into distinct subsets based on how their BOLD signal change  
170 correlated with behavioral RT-measures (Table 1, Figure 2). Activity in right inferior frontal gyrus (IFG)  
171 (corresponding to right VLPFC) and bilateral paracingulate cortex showed positive correlation with  
172 baseline speed measure [ $RT_{\text{truth}}$ ]. Left IFG (left VLPFC), left lateral occipital cortex (LOC), and bilateral  
173 anterior cingulate cortex (ACC) exhibited positive correlation with *relative appended lie RT measure*  
174 [ $(RT_{\text{lie}} - RT_{\text{truth}}) / RT_{\text{truth}}$ ]. Areas showing negative correlation with this measure were bilateral posterior  
175 cingulate (PCC) and right insular cortex (Figure 2.a). A subset of areas showed higher BOLD activity  
176 during lying but the amount of their BOLD signal-change did not correlate with either of behavioral RT-

177 measures. These areas were bilateral supplementary motor area (SMA), internal capsule white matter  
178 (ICWM), and left angular gyrus (AG; in the posterior segment of inferior parietal lobule, IPL) (Figure  
179 2.b).

## 180 **4. DISCUSSION**

181 We investigated reaction times and fMRI brain activity of subjects while they provided truthful or  
182 intentional false responses to a set of autobiographical yes-no questions. In agreement with multiple  
183 previous findings of longer RTs under deceptive conditions (Mameli et al., 2010; Marchewka et al., 2012;  
184 Nuñez et al., 2005) our results show that it takes longer to provide a false response than to answer  
185 truthfully. However, the size of this effect varied considerably from one participant to another: RT-cost of  
186 lying exceeded half a second in some individuals while being absent, and even negative, in some others  
187 (Figure 1.b). Inter-individual variability was also present in the baseline speed of participants: the slowest  
188 participant required almost triple the time spent by the fastest participant to answer questions truthfully  
189 (Figure 1.a). Results of our fMRI comparison between lie and truth conditions (Table 1) resembled  
190 previous neuroimaging findings (Christ et al., 2009; Farah et al., 2014), indicating lie-related BOLD  
191 signal change in regions of lateral and medial frontal cortex, as well as cingulate, parietal, and insular  
192 cortex. We classified this set of regions according to their correlation with behavioral RT-measures for  
193 baseline speed and lying RT-cost. Whether a region's BOLD signal-change during lying associates with  
194 RT-prolongation can hint at the probable cognitive function of that region during deception. In what  
195 follows, we will discuss general implications of current results in the light of extant literature.

### 196 **4.1. Correlation with RT-cost measure**

197 Our results showed that the amount of increase in BOLD activity of left VLPFC, bilateral ACC, and  
198 left LOC areas during lying directly correlates with lying RT-cost measure of each participant. Bilateral  
199 PCC and right insula showed inverse correlation with this measure. Correlation between activity of a  
200 region and RT-cost measure implies that the cognitive function undertaken by such region is critical for  
201 determining the reaction time length in events that required intentional false responding. We standardized  
202 RT-costs by expressing the lie-truth RT difference as a fraction of truthful responding speed of each  
203 participant. Therefore, if a brain region correlates with RT-cost measure but does not correlate with  
204 baseline speed measure the cognitive function of such region is probably exclusively employed for

205 providing intentional false responses, but not truthful answers. Overlap between RT-cost and baseline-  
206 speed correlating regions was only observed at the junction of ACC and paracingulate cortex. Pinpointing  
207 neural correlates of RT prolongation during lying in prefrontal and executive control regions corroborates  
208 the accumulating evidence indicating a predominant role for these regions in deceptive behavior (Abe,  
209 2011; Christ et al., 2009).

210 Our observation that neural correlates of RT prolongation during lying consists of both negatively  
211 correlating and positively correlating areas offers an explanation for the inconsistency of results achieved  
212 through transcranial direct current stimulation (tDCS) studies of deception. In first of these studies, Priori  
213 et al. (2008) applied tDCS to dorsolateral prefrontal cortex in order to manipulate the excitability of brain  
214 regions involved in deception. They found amplified RT-cost of lying after anodal tDCS but no change  
215 after cathodal tDCS. In contrast, Karim et al. (2010) found facilitation in lying after cathodal stimulation  
216 of anterior prefrontal cortex, as evidenced by reduced RT-cost and lower skin conductance responses, yet  
217 no effect after application of anodal tDCS to the same region. Reduction in RT-cost of lying after tDCS is  
218 also reported by Mameli et al. (2010) even though they applied anodal tDCS to dorsolateral prefrontal  
219 cortex. Our results suggest that slight spatial shifts—in range of centimeters—in the focus of functional  
220 changes induced by tDCS can lead to disparate behavioral outcomes. For instance facilitating the  
221 excitability of ACC—a region implied in conflict monitoring (Botvinick, Cohen, & Carter, 2004)—could  
222 increase the lie RT while the same modulation applied on PCC—a region implied in internally-directed  
223 cognition and autobiographical memory retrieval (Leech & Sharp, 2014)—could contrarily decrease the  
224 lie RT: since activity within these adjoining regions correlate with RT-cost of lying in opposite directions.

#### 225 **4.2. Correlation with baseline-RT measure**

226 In order to represent the dexterity of individuals in performing task instructions, we used average RT  
227 of participants during truthful answering as the measure of baseline speed. Participants who had faster  
228 baseline speed showed larger activity increase in right VLPFC and bilateral paracingulate cortex during  
229 lying. Correlation with baseline-RT implies involvement with cognitive functions that are shared between

230 truth telling and lying events, but employed to a larger extent during lying. This implication of our results  
231 conforms to previous literature suggesting general, nonspecific executive function roles for right VLPFC  
232 and paracingulate cortex. A recent meta-analysis (Levy & Wagner, 2011) found functional specialization  
233 within right VLPFC for detection of behaviorally relevant stimuli, updating of action plans, and  
234 responding to decision uncertainty: functions that are employed during a wide variety of cognitive tasks  
235 including truth telling and lying. More in line with the inter-individual difference approach of our study,  
236 Fornito et al. (2004) has shown that prominent paracingulate sulcus folding in an individual is associated  
237 with non-specific performance advantage on cognitively demanding executive function tasks. Our results  
238 suggest that paracingulate and right VLPFC functions relate to truth and lie RTs similarly and cannot  
239 impose a lie RT-cost in the same way that lie exclusive cognitive processes do.

#### 240 **4.3. Lie-related regions not correlating with either RT measures**

241 In bilateral SMA, ICWM and left AG, lie-related BOLD increase did not correlate with either of  
242 behavioral RT measures. This implies that the function undertaken by these areas does not contribute to  
243 prolongation of reaction times. These regions might perform relatively fast cognitive processes and/or  
244 work in parallel with other processes. Alternatively, such a region might be activated subsequent to  
245 subjects' response and play roles in retrospective evaluation of action. It is notable that both cortical areas  
246 in this subset associate with higher-level motor functions: subregions within SMA are involved with  
247 multiple stages of movement from preparation to execution (K. M. Lee, Chang, & Roh, 1999) and AG is  
248 believed to represent action awareness (Farrer et al., 2008). Our paradigm used two-alternative choice  
249 questions. It is conceivable that participants might have employed a motor task-switching strategy for  
250 providing false responses. Such strategy could justify higher activation in motor control regions in  
251 parallel and subsequent to cognitive processes culminating in execution of a deceptive behavior.

#### 252 **4.4. Functional dichotomy in VLPFC and cingulate cortex**

253 A noteworthy finding of our study is the dichotomy between right and left VLPFC, which accordingly  
254 showed exclusive correlation with baseline-speed and lying RT-cost measures. Our findings imply that

255 the cognitive function of right VLPFC is shared between lie and truth events but the function of left  
256 VLPFC is more specific to lying. This is consistent with previous literature signifying the functional  
257 dissociation between contralateral VLPFCs: right VLPFC is assumed to respond to decision uncertainty  
258 and motor inhibition (Levy & Wagner, 2011), while data from left VLPFC support a role in cognitive  
259 control of memory (Badre & Wagner, 2007). Areas in medial frontal and cingulate cortex also revealed an  
260 interesting pattern of functional dissociation. From anterior to posterior, ACC correlated with lie RT-cost  
261 positively, paracingulate region correlated with baseline speed, and PCC correlated with RT-cost  
262 negatively. This finding is in line with the alleged fundamental dichotomy within cingulate cortex,  
263 with anterior executive and posterior evaluative functions (Mohanty et al., 2007; Vogt, Finch, & Olson,  
264 1992).

#### 265 **4.5. Time-on-task effects might contaminate fMRI comparisons between lie and** 266 **truth**

267 It should be noted that fMRI results we discussed so far are correlative by nature; therefore, the  
268 direction of causality in the observed correlations could not be readily inferred. So far, we strived to  
269 interpret these correlations as the neural correlates of reaction time prolongation during lying; however,  
270 we should also consider the reverse causation direction: the possibility that activity of a brain region be  
271 modulated as a consequence of longer reaction times during lying. In fMRI experiments, participants  
272 briskly employ resources to responds to an event but are free to disengage in rest periods interleaving  
273 trials. A longer reaction time, whatever be the mechanism underlying its prolongation, calls for higher  
274 amount of maintained attention and goal-directed behavior (Grinband, Wager, Lindquist, Ferrera, &  
275 Hirsch, 2008). Indeed, recent studies have found that the length of an individual's "time-on-task"  
276 monotonically increases the BOLD amplitude within multiple frontal and parietal regions, irrespective of  
277 the nature of cognitive task at hand (Grinband et al., 2011; Yarkoni, Barch, Gray, Conturo, & Braver,  
278 2009). The extent of resemblance between brain regions affected by time-on-task duration (Yarkoni et al.,  
279 2009) and regions consistently reported by fMRI studies of deception (Farah et al., 2014) is remarkable.

280 Bilateral medial frontal gyrus, right IFG/VLPFC, right middle frontal gyrus/DLPFC, left anterior insula,  
281 left IPL, left precuneus/intraparietal sulcus, and bilateral thalamus show up in both lists. Nevertheless,  
282 ACC, PCC, and left VLPFC are among the deception-related regions that have not been implicated in  
283 time-on-task effects. In the current study, we found a similar dichotomy by separating deception-related  
284 regions correlating with the baseline speed of participants from regions correlating with the lying RT-  
285 cost. The fact that only right VLPFC is reported to show time-on-task effect bolsters the conjecture of  
286 left-lateralized involvement of VLPFC in deception that we proposed above.

287 On a wider perspective, the supposition that time-on-task duration affects frontal activity can  
288 undermine the validity of current mapping of the neural correlates of deception. Most of our knowledge  
289 comes from fMRI studies contrasting brain activity during lying versus truthful responding, without  
290 controlling for the confounding factor of difference in reaction times under the two conditions. By  
291 reviewing the studies included in the latest meta-analysis (Farah et al., 2014) we saw that only two out of  
292 23 studies have included reaction times in their fMRI model (Browndyke et al., 2008; Nuñez et al., 2005)  
293 despite the fact that most studies did report significantly longer RTs under deception conditions (see  
294 Supplementary information 1). Due to this systematic shortcoming, set of brain regions currently  
295 associated with deceptive behavior is probably contaminated by areas that show time-on-task effects but  
296 do not necessarily play a critical part in generation of deception. Further studies should address this  
297 ambiguity by following a more controlled approach to brain mapping of deception.

#### 298 **4.6. Limitations and future suggestions**

299 We acknowledge that the two-alternative forced choice questions used in this study does not tap on the  
300 whole spectrum of processes involved in deception. On events requiring intentional false responding,  
301 participants probably relied largely on response switching strategies: swapping the truthful response with  
302 the false alternative at the last moment. Mental processes required for fabrication of deceptive responses  
303 and cognitive planning are in all likelihood not engaged during the course of our experiment. Emotional  
304 engagement that is normally experienced during real deceptive acts was also probably absent in the

305 current study: our subjects were asked to blindly select half of questions and were later instructed to lie  
306 about them, while in ecologically valid situations the decision to lie will be determined by hidden  
307 personal motives and incentives. In addition to the type of questions, the verbal nature of them should be  
308 noted too. Our results implied left-lateralized specification of VLPFC for deception; however, it is unclear  
309 whether left-lateralization would be replicated in case of non-verbal forms of deception.

310 In the current discussion we tried to propose provisional implications regarding the probable cognitive  
311 function of lie-related brain areas based on the pattern of correlation with RT measures; nevertheless, we  
312 should reiterate that our experiment was not designed to provide exact inference about cognitive  
313 functions. Further studies are called for to confirm current implications. In this study, we exploited the  
314 between-subject variability in reaction times; a future study can try to investigate the within-subject trial-  
315 by-trial variability of reaction times and their correlation with activity level of lie-related brain regions.

#### 316 **4.7. Conclusion**

317 In this study, we tried to find what neural components contribute to RT prolongation when people try  
318 to respond deceptively. Based on current results, we speculate that cognitive functions undertaken by left  
319 VLPFC and cingulate cortex—regions correlating with the RT-cost measure—determine the amount of  
320 RT prolongation during lying and therefore might be more critical for producing deception. On the other  
321 hand, the increase in activation of paracingulate and right VLPFC—areas that correlated with the baseline  
322 speed measure and implicated in the time-on-task effect by the literature—might be mere byproducts of  
323 longer reaction times and higher mental load during deception.

### 324 **5. ACKNOWLEDGEMENTS**

325 Authors report no conflicts of interest. This research was supported by a grant from Tehran University  
326 of Medical Sciences.



## 327 6. REFERENCES

- 328 Abe, N. (2011). How the Brain Shapes Deception: An Integrated Review of the Literature. *The*  
329 *Neuroscientist*, 17(5), 560–574. <http://doi.org/10.1177/1073858410393359>
- 330 Badre, D., & Wagner, A. D. (2007). Left ventrolateral prefrontal cortex and the cognitive control of  
331 memory. *Neuropsychologia*, 45(13), 2883–901.  
332 <http://doi.org/10.1016/j.neuropsychologia.2007.06.015>
- 333 Botvinick, M. M., Cohen, J. D., & Carter, C. S. (2004). Conflict monitoring and anterior cingulate cortex:  
334 An update. *Trends in Cognitive Sciences*. <http://doi.org/10.1016/j.tics.2004.10.003>
- 335 Browndyke, J. N., Paskavitz, J., Sweet, L. H., Cohen, R. A., Tucker, K. A., Welsh-Bohmer, K. A., ...  
336 Schmechel, D. E. (2008). Neuroanatomical correlates of malingered memory impairment: event-  
337 related fMRI of deception on a recognition memory task. *Brain Injury*, 22(6), 481–9.  
338 <http://doi.org/10.1080/02699050802084894>
- 339 Caso, L., Gnisci, A., Vrij, A., & Mann, S. (2005). Processes underlying deception: an empirical analysis  
340 of truth and lies when manipulating the stakes. *Journal of Investigative ...*, 2(3), 195–202.  
341 <http://doi.org/10.1002/jip.32>
- 342 Christ, S. E., Van Essen, D. C., Watson, J. M., Brubaker, L. E., & McDermott, K. B. (2009). The  
343 contributions of prefrontal cortex and executive control to deception: Evidence from activation  
344 likelihood estimate meta-analyses. *Cerebral Cortex*, 19(7), 1557–1566.  
345 <http://doi.org/10.1093/cercor/bhn189>
- 346 Debey, E., De Houwer, J., & Verschuere, B. (2014). Lying relies on the truth. *Cognition*, 132(3), 324–  
347 334. <http://doi.org/10.1016/j.cognition.2014.04.009>
- 348 Debey, E., Liefoghe, B., De Houwer, J., & Verschuere, B. (2014). Lie, truth, lie: the role of task  
349 switching in a deception context. *Psychological Research*, 478–488. [http://doi.org/10.1007/s00426-](http://doi.org/10.1007/s00426-014-0582-4)  
350 [014-0582-4](http://doi.org/10.1007/s00426-014-0582-4)
- 351 Farah, M. J., Hutchinson, J. B., Phelps, E. a, & Wagner, A. D. (2014). Functional MRI-based lie  
352 detection: scientific and societal challenges. *Nature Publishing Group*, 15(2), 123–131.  
353 <http://doi.org/10.1038/nrm3665>
- 354 Farrer, C., Frey, S. H., Van Horn, J. D., Tunik, E., Turk, D., Inati, S., & Grafton, S. T. (2008). The  
355 angular gyrus computes action awareness representations. *Cerebral Cortex*, 18(2), 254–261.  
356 <http://doi.org/10.1093/cercor/bhm050>
- 357 Farrow, T. F. D., Hopwood, M.-C. C., Parks, R. W., Hunter, M. D., & Spence, S. A. (2011). Evidence of  
358 mnemonic ability selectively affecting truthful and deceptive response dynamics. *American Journal*  
359 *of Psychology*, 124(4), 447–453. <http://doi.org/10.5406/amerjpsyc.124.4.0447>
- 360 Fornito, A., Yucel, M., Wood, S., Stuart, G. W., Buchanan, J. A., Proffitt, T., ... Pantelis, C. (2004).  
361 Individual Differences in Anterior Cingulate/Paracingulate Morphology Are Related to Executive  
362 Functions in Healthy Males. *Cerebral Cortex*, 14(4), 424–431. <http://doi.org/10.1093/cercor/bhh004>

- 363 Ganis, G., Kosslyn, S. M., Stose, S., Thompson, W. L., & Yurgelun-Todd, D. A. (2003). Neural  
364 correlates of different types of deception: An fMRI investigation. *Cerebral Cortex*, *13*(8), 830–836.  
365 <http://doi.org/10.1093/cercor/13.8.830>
- 366 Gombos, V. A. V. A. (2006). The Cognition of Deception: The Role of Executive Processes in Producing  
367 Lies. *Genetic, Social and General Psychology Monographs*, *132*(3), 197–214.  
368 <http://doi.org/10.3200/MONO.132.3.197-214>
- 369 Grinband, J., Savitskaya, J., Wager, T. D., Teichert, T., Ferrera, V. P., & Hirsch, J. (2011). The dorsal  
370 medial frontal cortex is sensitive to time on task, not response conflict or error likelihood.  
371 *NeuroImage*, *57*(2), 303–311. <http://doi.org/10.1016/j.neuroimage.2010.12.027>
- 372 Grinband, J., Wager, T. D., Lindquist, M., Ferrera, V. P., & Hirsch, J. (2008). Detection of time-varying  
373 signals in event-related fMRI designs. *NeuroImage*, *43*(3), 509–520.  
374 <http://doi.org/10.1016/j.neuroimage.2008.07.065>
- 375 Jenkinson, M., Bannister, P., Brady, M., & Smith, S. (2002). Improved Optimization for the Robust and  
376 Accurate Linear Registration and Motion Correction of Brain Images. *NeuroImage*, *17*(2), 825–841.  
377 <http://doi.org/10.1006/nimg.2002.1132>
- 378 Karim, A. A., Schneider, M., Lotze, M., Veit, R., Sauseng, P., Braun, C., & Birbaumer, N. (2010). The  
379 Truth about Lying: Inhibition of the Anterior Prefrontal Cortex Improves Deceptive Behavior.  
380 *Cerebral Cortex*, *20*(1), 205–213. <http://doi.org/10.1093/cercor/bhp090>
- 381 Kleinberg, B., & Verschuere, B. (2016). The role of motivation to avoid detection in reaction time-based  
382 concealed information detection. *Journal of Applied Research in Memory and Cognition*, *5*(1), 43–  
383 51. <http://doi.org/10.1016/j.jarmac.2015.11.004>
- 384 Kozel, F. A., Johnson, K. A., Grenesko, E. L., Laken, S. J., Kose, S., Lu, X., ... George, M. S. (2009).  
385 Functional MRI detection of deception after committing a mock sabotage crime. In *Journal of*  
386 *Forensic Sciences* (Vol. 54, pp. 220–231). <http://doi.org/10.1111/j.1556-4029.2008.00927.x>
- 387 Kozel, F. A., Johnson, K. A., Mu, Q., Grenesko, E. L., Laken, S. J., & George, M. S. (2005). Detecting  
388 deception using functional magnetic resonance imaging. *Biological Psychiatry*, *58*(8), 605–13.  
389 <http://doi.org/10.1016/j.biopsych.2005.07.040>
- 390 Langleben, D. D., Schroeder, L., Maldjian, J. A., Gur, R. C., McDonald, S., Ragland, J. D., ... Childress,  
391 A. R. (2002). Brain activity during simulated deception: an event-related functional magnetic  
392 resonance study. *NeuroImage*, *15*(3), 727–32. <http://doi.org/10.1006/nimg.2001.1003>
- 393 Lee, K. M., Chang, K. H., & Roh, J. K. (1999). Subregions within the supplementary motor area activated  
394 at different stages of movement preparation and execution. *NeuroImage*, *9*(1), 117–123.  
395 <http://doi.org/10.1006/nimg.1998.0393>
- 396 Lee, T. M. C., Liu, H.-L., Tan, L.-H., Chan, C. C. H., Mahankali, S., Feng, C.-M., ... Gao, J.-H. (2002).  
397 Lie detection by functional magnetic resonance imaging. *Human Brain Mapping*, *15*(3), 157–164.  
398 <http://doi.org/10.1002/hbm.10020>

- 399 Leech, R., & Sharp, D. J. (2014). The role of the posterior cingulate cortex in cognition and disease.  
400 *Brain*. <http://doi.org/10.1093/brain/awt162>
- 401 Levy, B. J., & Wagner, A. D. (2011). Cognitive control and right ventrolateral prefrontal cortex: reflexive  
402 reorienting, motor inhibition, and action updating. *Annals of the New York Academy of Sciences*,  
403 *1224*(Ba 45), 40–62. <http://doi.org/10.1111/j.1749-6632.2011.05958.x>
- 404 Mameli, F., Mrakic-Sposta, S., Vergari, M., Fumagalli, M., Macis, M., Ferrucci, R., ... Priori, A. (2010).  
405 Dorsolateral prefrontal cortex specifically processes general - but not personal - knowledge  
406 deception: Multiple brain networks for lying. *Behavioural Brain Research*, *211*(2), 164–168.  
407 <http://doi.org/10.1016/j.bbr.2010.03.024>
- 408 Marchewka, A., Jednorog, K., Falkiewicz, M., Szeszkowski, W., Grabowska, A., & Szatkowska, I.  
409 (2012). Sex, lies and fMRI--gender differences in neural basis of deception. *PLoS One*, *7*(8), e43076.  
410 <http://doi.org/10.1371/journal.pone.0043076>
- 411 Marston, W. M. (1920). Reaction-time symptoms of deception. *Journal of Experimental Psychology*,  
412 *3*(1), 72–87. <http://doi.org/10.1037/h0067963>
- 413 Mohanty, A., Engels, A. S., Herrington, J. D., Heller, W., Ho, M.-H. R., Banich, M. T., ... Miller, G. a.  
414 (2007). Differential engagement of anterior cingulate cortex subdivisions for cognitive and  
415 emotional function. *Psychophysiology*, *44*(3), 343–51. <http://doi.org/10.1111/j.1469-8986.2007.00515.x>
- 417 Mumford, J. A., Poline, J.-B., & Poldrack, R. A. (2015). Orthogonalization of Regressors in fMRI  
418 Models. *PLOS ONE*, *10*(4), e0126255. <http://doi.org/10.1371/journal.pone.0126255>
- 419 Nuñez, J. M., Casey, B. J., Egner, T., Hare, T., & Hirsch, J. (2005). Intentional false responding shares  
420 neural substrates with response conflict and cognitive control. *NeuroImage*, *25*(1), 267–77.  
421 <http://doi.org/10.1016/j.neuroimage.2004.10.041>
- 422 Priori, A., Mameli, F., Cogiamanian, F., Marceglia, S., Tiriticco, M., Mrakic-Sposta, S., ... Sartori, G.  
423 (2008). Lie-specific involvement of dorsolateral prefrontal cortex in deception. *Cerebral Cortex*,  
424 *18*(2), 451–455. <http://doi.org/10.1093/cercor/bhm088>
- 425 Sheridan, M. R., & Flowers, K. A. (2010). Reaction times and deception: The lying constant.  
426 *International Journal of Psychological Studies*, *2*(2), 41–51. <http://doi.org/10.5539/ijps.v2n2p41>
- 427 Sip, K. E., Lynge, M., Wallentin, M., McGregor, W. B., Frith, C. D., & Roepstorff, A. (2010). The  
428 production and detection of deception in an interactive game. *Neuropsychologia*, *48*(12), 3619–  
429 3626. <http://doi.org/10.1016/j.neuropsychologia.2010.08.013>
- 430 Sip, K. E., Roepstorff, A., McGregor, W., & Frith, C. D. (2008). Detecting deception: the scope and  
431 limits. *Trends in Cognitive Sciences*, *12*(2), 48–53. <http://doi.org/10.1016/j.tics.2007.11.008>
- 432 Sip, K. E., Skewes, J. C., Marchant, J. L., McGregor, W. B., Roepstorff, A., & Frith, C. D. (2012). What  
433 if I get busted? Deception, choice, and decision-making in social interaction. *Frontiers in*  
434 *Neuroscience*, (APR). <http://doi.org/10.3389/fnins.2012.00058>

- 435 Smith, S. M. (2002). Fast robust automated brain extraction. *Human Brain Mapping*, *17*(3), 143–55.  
436 <http://doi.org/10.1002/hbm.10062>
- 437 Spence, S. A., Farrow, T. F. D., Herford, A. E., Wilkinson, I. D., Zheng, Y., & Woodruff, P. W. R.  
438 (2001). Behavioural and functional anatomical correlates of deception in humans. *Neuroreport*,  
439 *12*(13), 2849–2853. <http://doi.org/10.1097/00001756-200109170-00019>
- 440 Varga, M., Visu-Petra, G., Miclea, M., & Visu-Petra, L. (2015). The “good cop, bad cop” effect in the rt-  
441 based concealed information test: Exploring the effect of emotional expressions displayed by a  
442 virtual investigator. *PLoS ONE*, *10*(2). <http://doi.org/10.1371/journal.pone.0116087>
- 443 Vendemia, J. M. C., Buzan, R. F., & Simon-Dack, S. L. (2005). Reaction time of motor responses in two-  
444 stimulus paradigms involving deception and congruity with varying levels of difficulty. *Behavioural*  
445 *Neurology*, *16*, 25–36. <http://doi.org/10.1155/2005/804026>
- 446 Verschuere, B., & in 't Hout, W. (2016). Psychopathic Traits and Their Relationship with the Cognitive  
447 Costs and Compulsive Nature of Lying in Offenders. *PLOS ONE*, *11*(7), e0158595.  
448 <http://doi.org/10.1371/journal.pone.0158595>
- 449 Verschuere, B., Suchotzki, K., & Debey, E. (2015). Detecting Deception Through Reaction Times. In  
450 *Detecting Deception: Current Challenges and Cognitive Approaches* (pp. 269–291).  
451 <http://doi.org/10.1002/9781118510001.ch12>
- 452 Visu-Petra, G., Miclea, M., Buş, I., & Visu-Petra, L. (2014). Detecting concealed information: The role of  
453 individual differences in executive functions and social desirability. *Psychology, Crime & Law*,  
454 *20*(1), 20–36. <http://doi.org/10.1080/1068316X.2012.736509>
- 455 Visu-Petra, G., Miclea, M., & Visu-Petra, L. (2012). Reaction Time-based Detection of Concealed  
456 Information in Relation to Individual Differences in Executive Functioning. *Applied Cognitive*  
457 *Psychology*, *26*(3), 342–351. <http://doi.org/10.1002/acp.1827>
- 458 Vogt, B. a, Finch, D. M., & Olson, C. R. (1992). Functional heterogeneity in cingulate cortex: the anterior  
459 executive and posterior evaluative regions. *Cerebral Cortex (New York, N.Y. □: 1991)*, *2*(6), 435–43.  
460 Retrieved from <http://www.ncbi.nlm.nih.gov/pubmed/1477524>
- 461 Vrij, A., Granhag, P. A., Mann, S., & Leal, S. (2011). Outsmarting the Liars: Toward a Cognitive Lie  
462 Detection Approach. *Current Directions in ...*, *20*(1), 28–32.  
463 <http://doi.org/10.1177/0963721410391245>
- 464 Walczyk, J. J., Roper, K. S., Seemann, E., & Humphrey, A. M. (2003). Cognitive mechanisms underlying  
465 lying to questions: response time as a cue to deception. *Applied Cognitive Psychology*, *17*(7), 755–  
466 774. <http://doi.org/10.1002/acp.914>
- 467 Williams, E. J., Bott, L. A., Patrick, J., & Lewis, M. B. (2013). Telling Lies: The Irrepressible Truth?  
468 *PLoS ONE*, *8*(4). <http://doi.org/10.1371/journal.pone.0060713>
- 469 Woolrich, M. W., Behrens, T. E. J., Beckmann, C. F., Jenkinson, M., & Smith, S. M. (2004). Multilevel  
470 linear modelling for fMRI group analysis using Bayesian inference. *NeuroImage*, *21*(4), 1732–  
471 1747.

472 Yarkoni, T., Barch, D. M., Gray, J. R., Conturo, T. E., & Braver, T. S. (2009). BOLD Correlates of Trial-  
473 by-Trial Reaction Time Variability in Gray and White Matter: A Multi-Study fMRI Analysis. *PLoS*  
474 *ONE*, 4(1), e4257. <http://doi.org/10.1371/journal.pone.0004257>

475

476

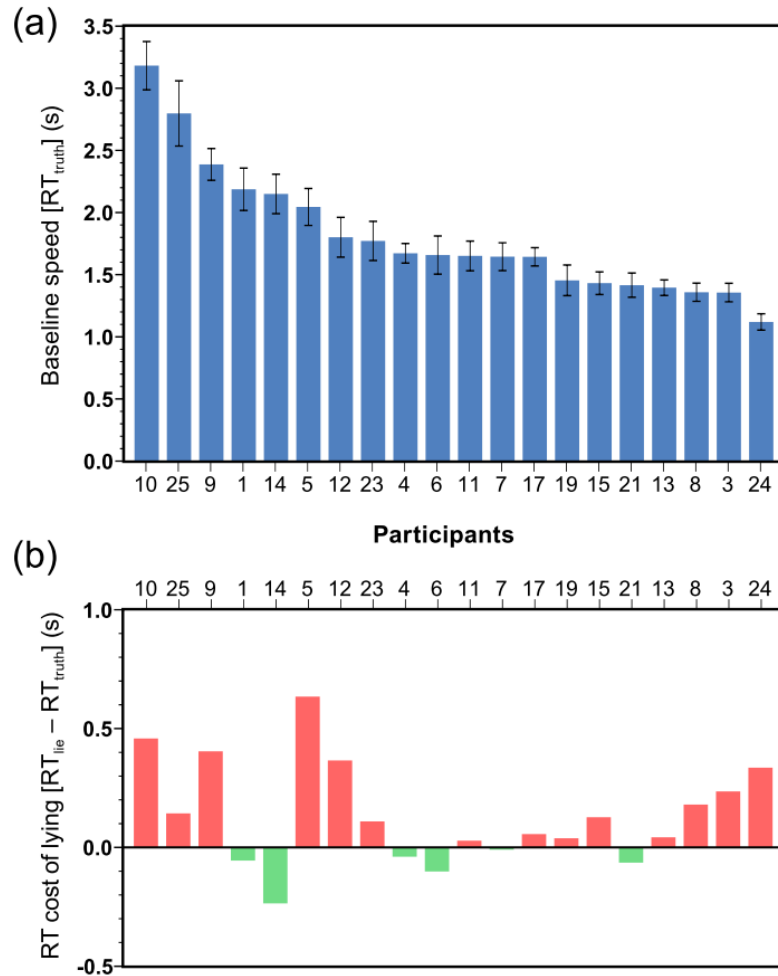

477

478 **Figure 1.** Participants showed considerable inter-individual variability both in the baseline speed and in  
479 the RT-cost of lying. **(a)** Average reaction time (RT) in truth trials, sorted in descending order. This value  
480 was used as the baseline speed measure of each participant in the fMRI analysis. Error bars show  
481  $\pm 2$  standard error of the mean. **(b)** Difference between mean RT in lie and truth trials [RT<sub>lie</sub> - RT<sub>truth</sub>].  
482 This value was divided by the RT<sub>truth</sub> of each participant to yield *relative appended lie RT*, which was  
483 used as the lying RT-cost measure of each participant in the fMRI analysis. Bars colored green denote  
484 subjects with faster RT in lie trials.

**Table 1.** Brain regions showing [lie > truth] BOLD effect, classified based on the correlation of their activity with *baseline speed*<sup>a</sup> and *lying RT-cost*<sup>b</sup> measures

|                                             | Brain region                    | H     | Cluster size (voxels) | Peak Z-value | Peak Coordinates (MNI) |     |     | p value <sup>c</sup> |
|---------------------------------------------|---------------------------------|-------|-----------------------|--------------|------------------------|-----|-----|----------------------|
|                                             |                                 |       |                       |              | x                      | y   | z   |                      |
| <b>Baseline speed, Positive correlation</b> | Paracingulate gyrus             | L & R | 1072                  | 4.07         | -2                     | 26  | 42  | < 0.001              |
|                                             | Middle frontal gyrus            | L     | 547                   | 3.7          | -36                    | -2  | 56  | 0.008                |
|                                             | Inferior frontal gyrus (VLPFC)  | R     | 515                   | 3.38         | 42                     | 24  | 20  | 0.012                |
| <b>Lying RT-cost, Positive correlation</b>  | Inferior frontal gyrus (VLPFC)  | L     | 1520                  | 4.4          | -54                    | 20  | 24  | < 0.001              |
|                                             | lateral occipital cortex        | L     | 916                   | 3.73         | -34                    | -60 | 60  | < 0.001              |
|                                             | Anterior cingulate cortex       | L & R | 855                   | 4.01         | 0                      | 20  | 36  | < 0.001              |
| <b>Lying RT-cost, Negative correlation</b>  | Posterior cingulate cortex      | L & R | 858                   | 3.55         | 8                      | -10 | 42  | < 0.001              |
|                                             | Insular cortex                  | R     | 768                   | 3.87         | 36                     | 4   | 10  | 0.001                |
|                                             | Post central gyrus              | R     | 688                   | 3.55         | 54                     | -18 | 44  | 0.001                |
|                                             | Cerebellum nucleus V            | R     | 517                   | 3.21         | 30                     | -34 | -36 | 0.01                 |
|                                             | Posterior middle temporal gyrus | R     | 446                   | 3.17         | 60                     | -48 | 2   | 0.023                |
| <b>No correlation</b>                       | Internal capsule white matter   | L & R | 1249                  | 4.01         | 2                      | -6  | 4   | < 0.001              |
|                                             | Supplementary motor area        | L & R | 519                   | 3.5          | -4                     | 4   | 70  | 0.011                |
|                                             | Angular gyrus (IPL)             | L     | 448                   | 3.22         | -54                    | -56 | 38  | 0.026                |

<sup>a</sup> Average speed in answering questions truthfully [ $RT_{truth}$ ] was used as representative of participants' baseline speed.

<sup>b</sup> *Relative appended lie RT* [ $(RT_{lie} - RT_{truth}) / RT_{truth}$ ] was used as representative of RT-cost of lying.

<sup>c</sup> Z statistic images were thresholded using clusters determined by  $Z > 2.3$  and a corrected cluster significance of  $p < 0.05$ .

H, hemisphere; IPL, inferior parietal lobule L, left; MNI, Montreal neurological institute; R, right; RT, reaction time; VLPFC, ventrolateral prefrontal cortex.





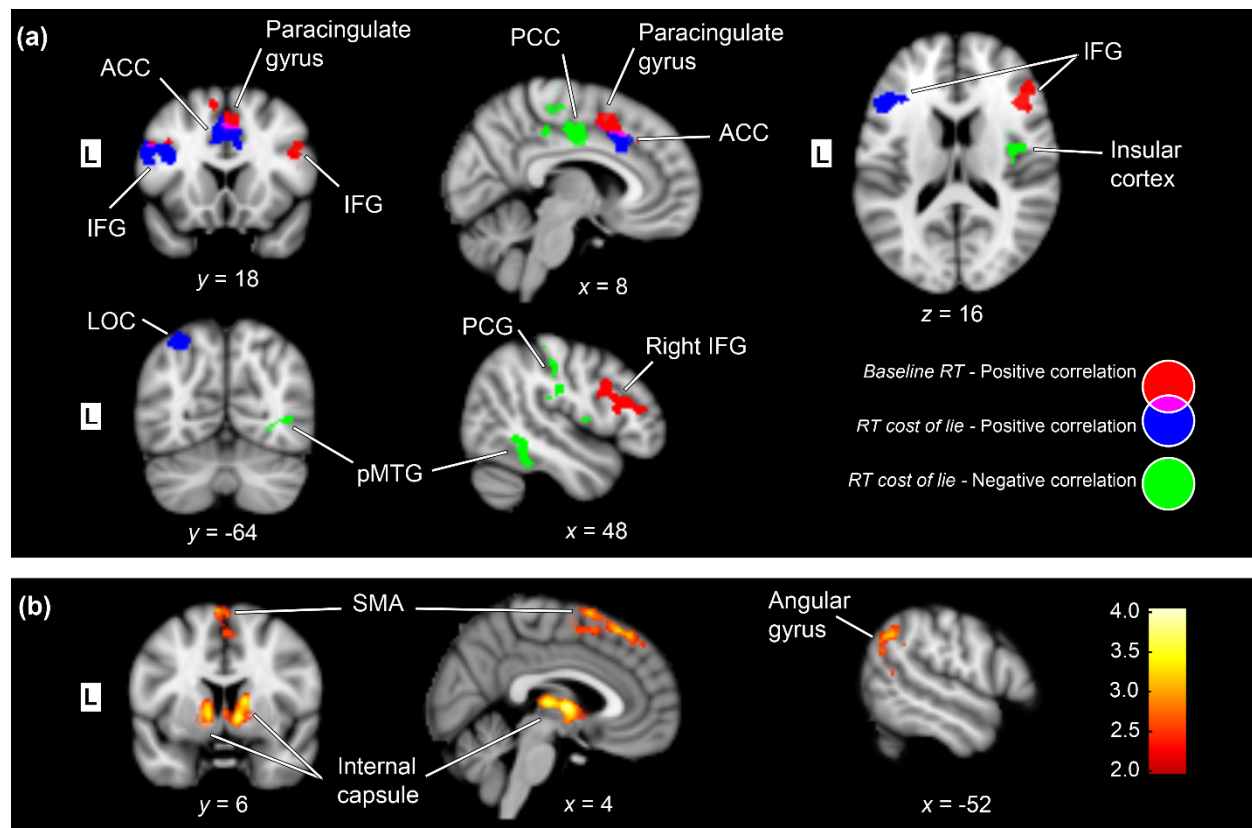

486

487 **Figure 2.** Group-level results of [lie > truth] BOLD contrast and correlations with behavioral reaction  
488 time (RT) measures. Z statistic images were thresholded using clusters determined by  $Z > 2.3$  and a  
489 corrected cluster significance of  $p < 0.05$ . Locations of slices are indicated by the x, y, and z coordinates  
490 as per the MNI coordinate system. (a) Brain regions where the BOLD signal difference between lying and  
491 truth telling conditions correlated with at least one of the behavioral indices. Average speed in answering  
492 questions truthfully [ $RT_{\text{truth}}$ ] was used as representative of participants' baseline speed. *Relative appended*  
493 *lie RT* [ $(RT_{\text{lie}} - RT_{\text{truth}})/RT_{\text{truth}}$ ] was used as representative of RT-cost of lying. This measure is an  
494 indicator of how participants' RTs changed while lying. (b) Brain regions that showed significant BOLD  
495 signal difference between lying and truth telling conditions but did not correlate with either of behavioral  
496 RT indices. Color bar indicates Z-values.

497 ACC, Anterior cingulate cortex; IFG, Inferior frontal gyrus; L, Left; LOC, Lateral occipital cortex; PCC,  
498 Posterior cingulate cortex; PCG, Postcentral gyrus; pMTG, Posterior middle temporal gyrus; SMA,  
499 Supplementary motor area.

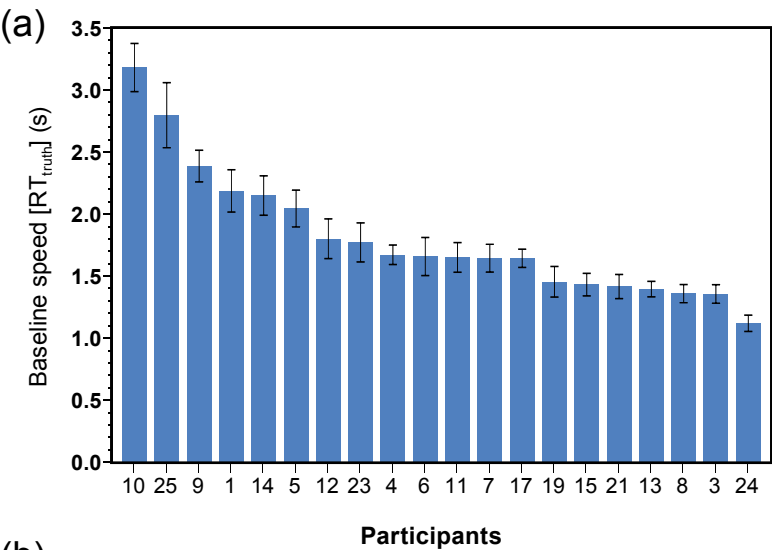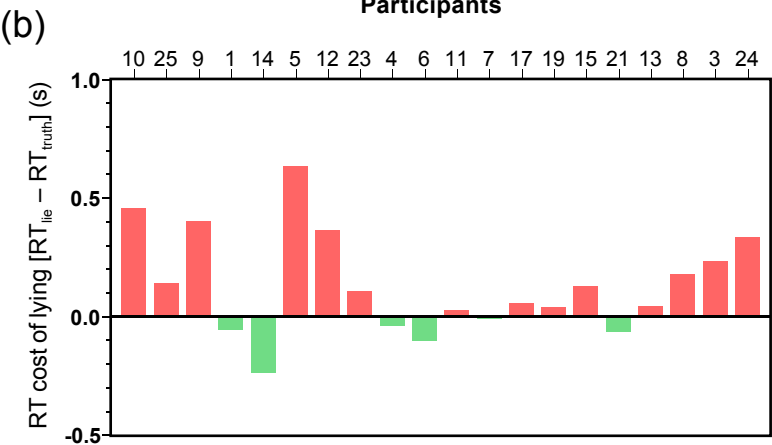

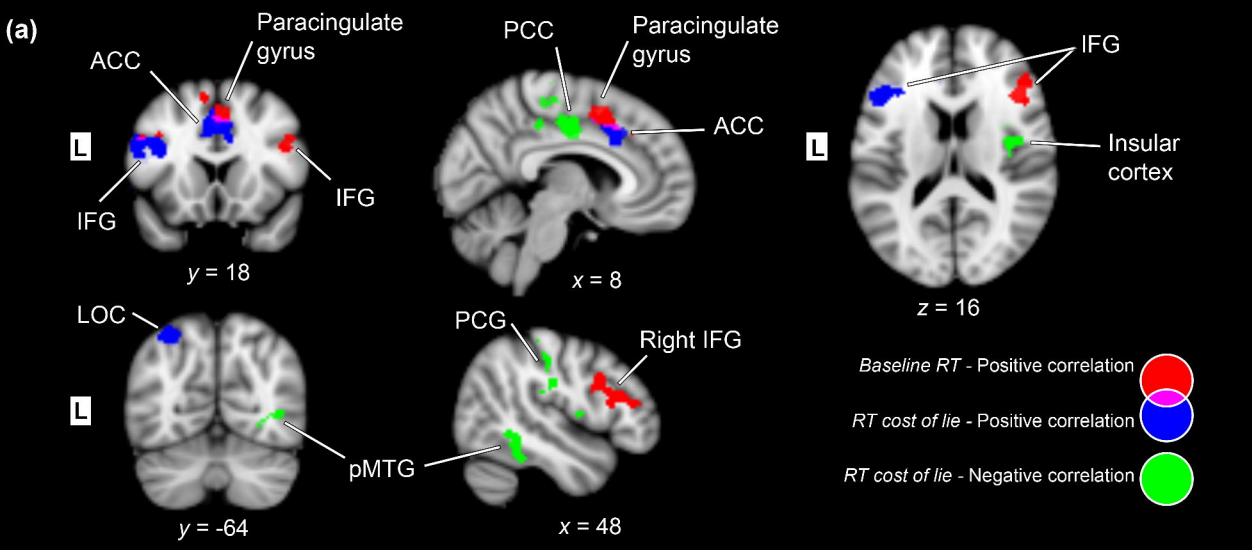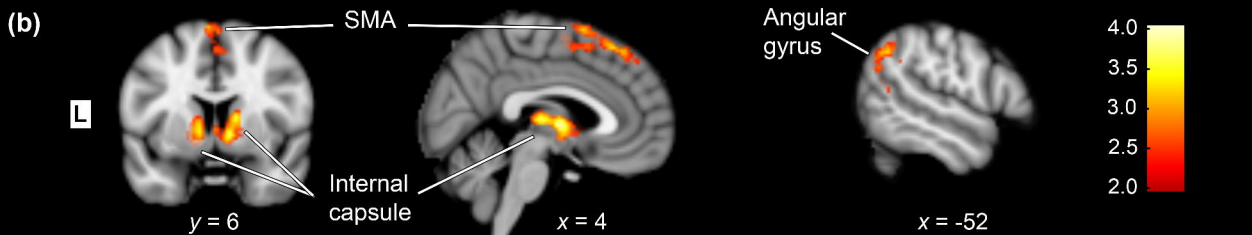

Source: https://www.biorxiv.org/content/biorxiv/early/2016/11/26/089847.full.pdf
